# Supplementary material for: Time course of physiological variables during inter-hospital helicopter transport of ventilated COVID-19 patients
Source: Springer Nature journal article supplement (doi:10.1007/s00134-022-06686-1), 2022-04-12
Supplement: MOESM1 [file 20305370]

# Time course of physiological variables during inter-hospital helicopter transport of ventilated COVID-19 patients: an observational cohort study using longitudinal data

## Supplementary Material

Ed J. Spoelder, Jos Lerou, Ewald Bronkhorst, Geert-Jan van Geffen, Cornelis Slagt

Here we present the following supplementary material:

- 1) Flow chart of the transfer process (Fig. S1)
- 2) Eligibility criteria for a COVID-19 patient to be transported by helicopter (Table S1)
- 3) Clinical characteristics of inter-hospital helicopter transport (Table S2)
- 4) Impact of inter-hospital helicopter transport on physiological variables (Table S3)
- 5) Charts showing the individual episodes with MAP < 65 mmHg or with SpO<sub>2</sub> < 90% (Fig. S2)
- 6) Details on minor adverse events (Table S4)

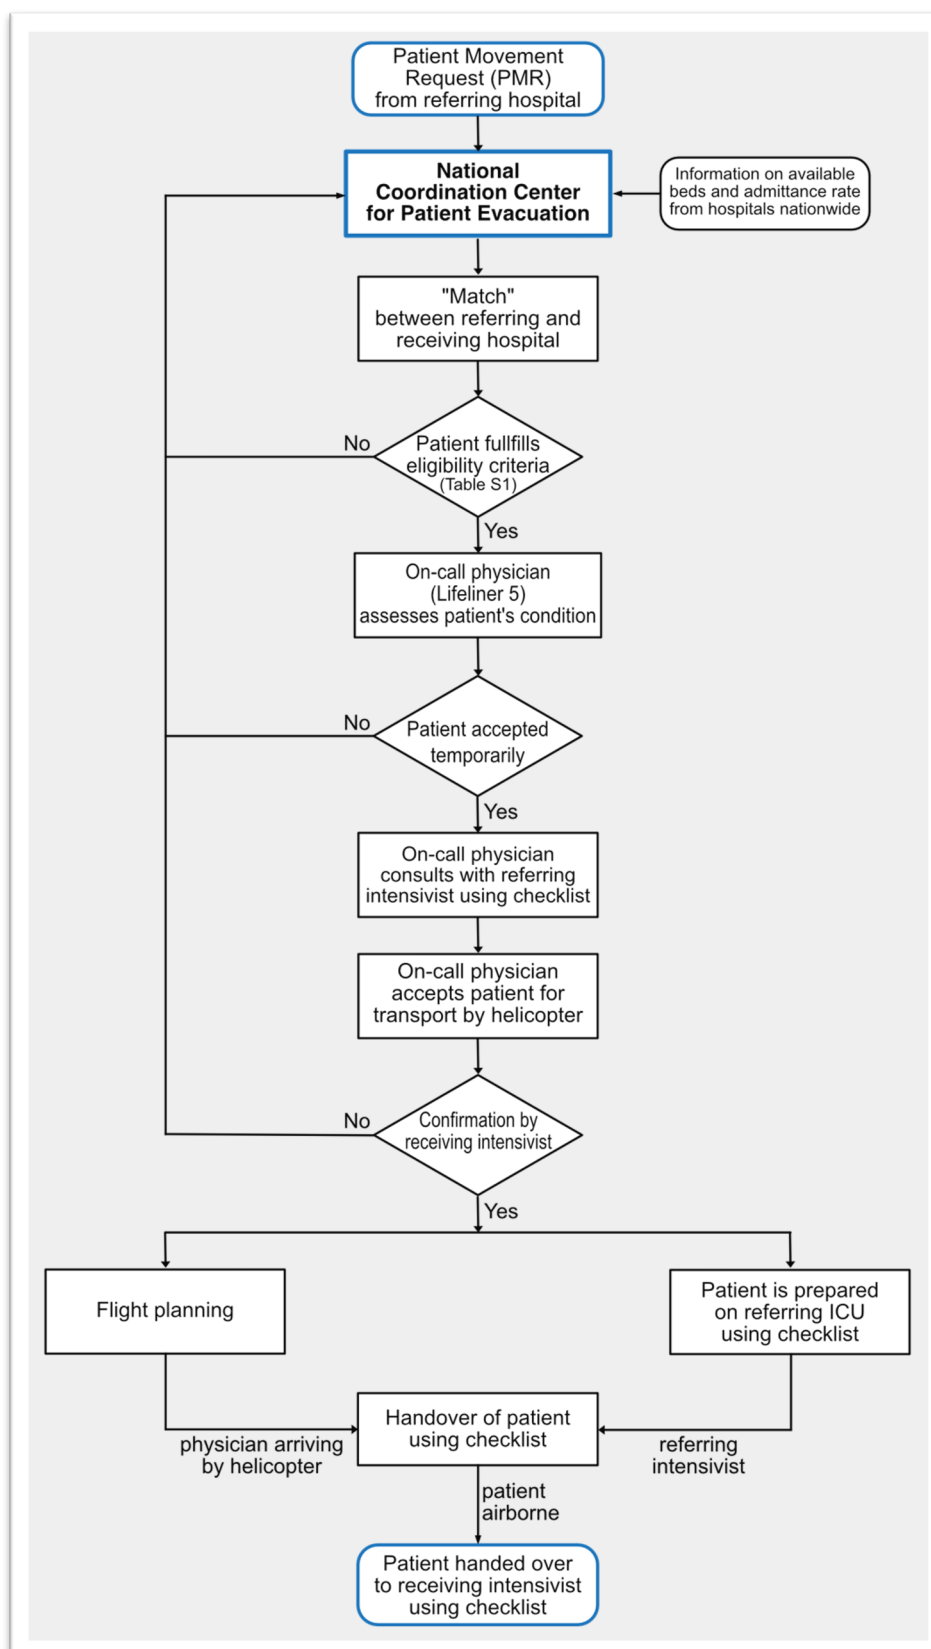

**Figure S1. Flow chart of the inter-hospital transfer process.** The National Coordination Center for Patient Evacuation<sup>1</sup> (known as LCPS = Landelijk Coördinatiecentrum Patiënten Spreiding) has been set up with help of the Dutch Ministry of Defense

<sup>1</sup> <https://www.igh.com/post/a-look-inside-the-national-coordination-center-for-patient-evacuation-lcps> (Accessed 27 October, 2021)

**Table S1 Eligibility criteria for a COVID-19 patient to be transported by helicopter**

|                |                                                                                                                                                                                                                                                                                                                                                                                                                                                                                                                                       |
|----------------|---------------------------------------------------------------------------------------------------------------------------------------------------------------------------------------------------------------------------------------------------------------------------------------------------------------------------------------------------------------------------------------------------------------------------------------------------------------------------------------------------------------------------------------|
| <b>General</b> | distance for ground-based transport by a Mobile Intensive Care Unit exceeds 100 km<br>risks of transport outweigh health benefits                                                                                                                                                                                                                                                                                                                                                                                                     |
| <b>Patient</b> | has a tracheal tube or tracheostoma if mechanically ventilated<br>is in supine position<br>is deeply sedated according to the Richmond Agitation Sedation Scale (RASS), i.e., RASS is -4 or -5<br>weighs preferably less than 135 kg <sup>a</sup><br>requires less than 2580 liters oxygen during the flight, i.e., the helicopter's maximum oxygen capacity<br>has a clinical condition permitting eligible aeromedical transport<br>does not depend on medical equipment other than a ventilator and a maximum of six syringe pumps |

<sup>a</sup> at the discretion of the crew of the Helicopter Emergency Medical Service team

**Table S2 Clinical characteristics of inter-hospital helicopter transport (n=117) (continued on next page)**

| Label                                                  | Mean <sup>a</sup> (SD) [minimum-maximum]<br>or n (%) |
|--------------------------------------------------------|------------------------------------------------------|
| <b>Patient data</b>                                    |                                                      |
| Age (yr)                                               | 63 (11) [23-82]                                      |
| Male                                                   | 89 (76)                                              |
| Reported body weight (kg)                              | 91 (17) [40-160]                                     |
| Body Mass Index (kg m <sup>-2</sup> )                  | 30 (5) [16-49]                                       |
| Ideal body weight <sup>b</sup> (kg)                    | 70 (10) [50-91]                                      |
| NACA <sup>c</sup> score 4 or 5                         | 117 (100)                                            |
| <b>Sedation level</b>                                  |                                                      |
| RASS <sup>d</sup> -4 or -5                             | 114 (97)                                             |
| RASS -3                                                | 2 (2)                                                |
| RASS -2                                                | 0 (0)                                                |
| RASS -1                                                | 1 (1)                                                |
| <b>Ventilation</b>                                     |                                                      |
| Airway                                                 |                                                      |
| Tracheal tube                                          | 110 (94)                                             |
| Tracheostoma                                           | 7 (6)                                                |
| Mode                                                   |                                                      |
| Pressure controlled                                    | 94 (80)                                              |
| Volume controlled                                      | 16 (14)                                              |
| Pressure support                                       | 7 (6)                                                |
| Volumes and pressures                                  |                                                      |
| Tidal volume (mL)                                      | 463 (77) [280-775]                                   |
| Frequency (min <sup>-1</sup> )                         | 22 (4) [14-32]                                       |
| Max. inspiratory pressure (cm H <sub>2</sub> O)        | 24 (5) [13-36]                                       |
| PEEP (cm H <sub>2</sub> O)                             | 12 (3) [6-20]                                        |
| Tidal volume per kg reported BW (mL kg <sup>-1</sup> ) | 5.2 (1.3) [3.1-10.6]                                 |
| Tidal volume per kg ideal BW (mL kg <sup>-1</sup> )    | 6.5 (1.0) [4.4-9.9]                                  |
| Oxygen F <sub>i</sub> O <sub>2</sub> (%)               | 50 (12) [30-90]                                      |

(continued on next page)

Table S2 (continued)

| Label                            | Mean <sup>a</sup> (SD) [minimum-maximum]<br>or n (%) |
|----------------------------------|------------------------------------------------------|
| <b>Sedatives</b>                 |                                                      |
| Propofol                         | 30 (26)                                              |
| Midazolam                        | 33 (28)                                              |
| Propofol / Midazolam             | 46 (39)                                              |
| Propofol / Clonidine             | 2 (2)                                                |
| Propofol / Midazolam / Clonidine |                                                      |
| Midazolam / s-Ketamine           | 4 (3)                                                |
| Midazolam / Clonidine            | 1 (1)                                                |
| None                             | 0 (0)                                                |
| <b>Opioid</b>                    |                                                      |
| Sufentanil                       | 50 (43)                                              |
| Fentanyl                         | 24 (20)                                              |
| Remifentanil                     | 19 (16)                                              |
| Morphine                         | 15 (13)                                              |
| Piritramide                      | 2 (2)                                                |
| None                             | 7 (6)                                                |
| <b>Vasopressor - Inotrope</b>    |                                                      |
| Norepinephrine                   | 102 (87)                                             |
| Norepinephrine / Isoprenaline    | 1 (1)                                                |
| Norepinephrine / Milrinone       | 1 (1)                                                |
| Dopamine                         | 1 (1)                                                |
| None                             | 12 (10)                                              |
| <b>Neuromuscular blocker</b>     |                                                      |
| Rocuronium                       | 46 (39)                                              |
| Atracurium                       | 1 (1)                                                |
| None                             | 70 (60)                                              |
| <b>Access to circulation</b>     |                                                      |
| Central venous Jugular           | 88 (83)                                              |
| Subclavian                       | 2 (2)                                                |
| Femoral                          | 16 (15)                                              |
| None                             | 11 (10)                                              |
| Arterial Radial                  | 108 (93)                                             |
| Brachial                         | 4 (3)                                                |
| Femoral                          | 4 (3)                                                |
| Pedal                            | 1 (1)                                                |
| <b>Syringe pumps</b>             |                                                      |
| 2                                | 2 (2)                                                |
| 3                                | 9 (8)                                                |
| 4                                | 40 (34)                                              |
| 5                                | 38 (32)                                              |
| 6                                | 28 (24)                                              |

<sup>a</sup> n=117, except for body mass index (BMI), body weight (BW) as well as PEEP (n=114), inspired oxygen concentration (F<sub>I</sub>O<sub>2</sub>) (n=112) and volumes as well as pressures (n=92) because of missing values

<sup>b</sup> Ideal BW = 0.9079 × height – 88.022 for male and 0.9049 × height – 92.006 for female patients

<sup>c</sup> NACA = National Advisory Committee for Aeronautics

<sup>d</sup> RASS = Richmond Agitation and Sedation Scale

Table S3 Impact of inter-hospital helicopter transport on physiological variables of 117 ventilated COVID-19 patients

| Mixed-Effects Linear Regression <sup>a</sup> |                      |                                             |         | Mixed-Effects Logistic Regression <sup>d</sup> |                      |                                               |                         |         |
|----------------------------------------------|----------------------|---------------------------------------------|---------|------------------------------------------------|----------------------|-----------------------------------------------|-------------------------|---------|
| Response Variable                            | Explanatory Variable | Estimate <sup>b</sup> (95% CI) <sup>c</sup> | p-value | Response Variable                              | Explanatory Variable | Odds Ratio <sup>e</sup> (95% CI) <sup>c</sup> | p-value                 |         |
| MAP                                          | Intercept            | 83.9 (82.1 ... 85.7)                        |         | MAP < 65 mmHg                                  | Time                 | Tref                                          | 1.000 (reference level) |         |
|                                              | Tair                 | -1.8 (-2.5 ... -1.2)                        | < 0.001 |                                                |                      | Tair                                          | 0.335 (0.260 ... 0.431) | < 0.001 |
|                                              | Tground              | -3.5 (-4.3 ... -2.7)                        | < 0.001 |                                                |                      | Tground                                       | 0.486 (0.350 ... 0.675) | < 0.001 |
| SpO <sub>2</sub>                             | Intercept            | 93.84 (93.47 ... 94.22)                     |         | SpO <sub>2</sub> < 90%                         | Time                 | Tref                                          | 1.000 (reference level) |         |
|                                              | Tair                 | -0.20 (-0.27 ... -0.13)                     | < 0.001 |                                                |                      | Tair                                          | 0.231 (0.155 ... 0.345) | < 0.001 |
|                                              | Tground              | 0.02 (-0.07 ... 0.11)                       | 0.723   |                                                |                      | Tground                                       | 0.214 (0.119 ... 0.385) | < 0.001 |
| HR                                           | Intercept            | 83.0 (79.0 ... 87.1)                        |         | HR < 50 min <sup>-1</sup>                      | Time                 | Tref                                          | 1.000 (reference level) |         |
|                                              | Tair                 | -1.7 (-2.1 ... -1.4)                        | < 0.001 |                                                |                      | Tair                                          | 2.658 (1.450 ... 4.871) | 0.002   |
|                                              | Tground              | -1.9 (-2.4 ... -1.4)                        | < 0.001 |                                                |                      | Tground                                       | 3.400 (1.622 ... 7.130) | 0.001   |
| P <sub>ET</sub> CO <sub>2</sub>              | Intercept            | 41.5 (40.3 ... 42.8)                        |         | HR > 120 min <sup>-1</sup>                     | Time                 | Tref                                          | 1.000 (reference level) |         |
|                                              | Tair                 | -1.4 (-1.6 ... -1.3)                        | < 0.001 |                                                |                      | Tair                                          | 1.921 (1.160 ... 3.184) | 0.011   |
|                                              | Tground              | -0.6 (-0.8 ... -0.4)                        | < 0.001 |                                                |                      | Tground                                       | 2.097 (1.103 ... 3.968) | 0.024   |

<sup>a</sup> Mixed-effects linear regression estimates the relationship between one response variable and the explanatory variable 'time'. 'Time' is a factor with three levels: 1) reference level, i.e., the last ten minutes prior to take-off (Tref), 2) the time when patients are airborne on board the helicopter (Tair), and 3) the first ten minutes after landing (Tground)

<sup>b</sup> Estimates obtained for 'Intercept' are estimated values for average mean arterial pressure (MAP expressed in mmHg), arterial oxygen saturation measured by pulse oximetry (SpO<sub>2</sub> in %), heart rate (HR in bpm) and end-tidal carbon dioxide partial pressure (P<sub>ET</sub>CO<sub>2</sub> in mmHg) during Tref

Estimates obtained for Tair and Tground are differences with the estimated values for Tref

Estimates were obtained with 'winsorization' if the residuals of the linear regression were not normally distributed. The estimates listed in the table are those obtained without winsorization as they were similar to those obtained with winsorization

<sup>c</sup> 95% CI = 95% confidence interval, given as (lower limit ... upper limit) because of the occurrence of negative numbers

<sup>d</sup> Mixed-effects logistic regression estimates the association between each of the four binary response variables (MAP < 65 mmHg, SpO<sub>2</sub> < 90%, HR < 50 bpm and HR > 120 bpm) and the explanatory variable 'time'

<sup>e</sup> Logistic models are structured such that an odds ratio < 1 indicates that the period Tair or Tground is associated with observing the binary response variable relatively less often than during Tref, which is favorable

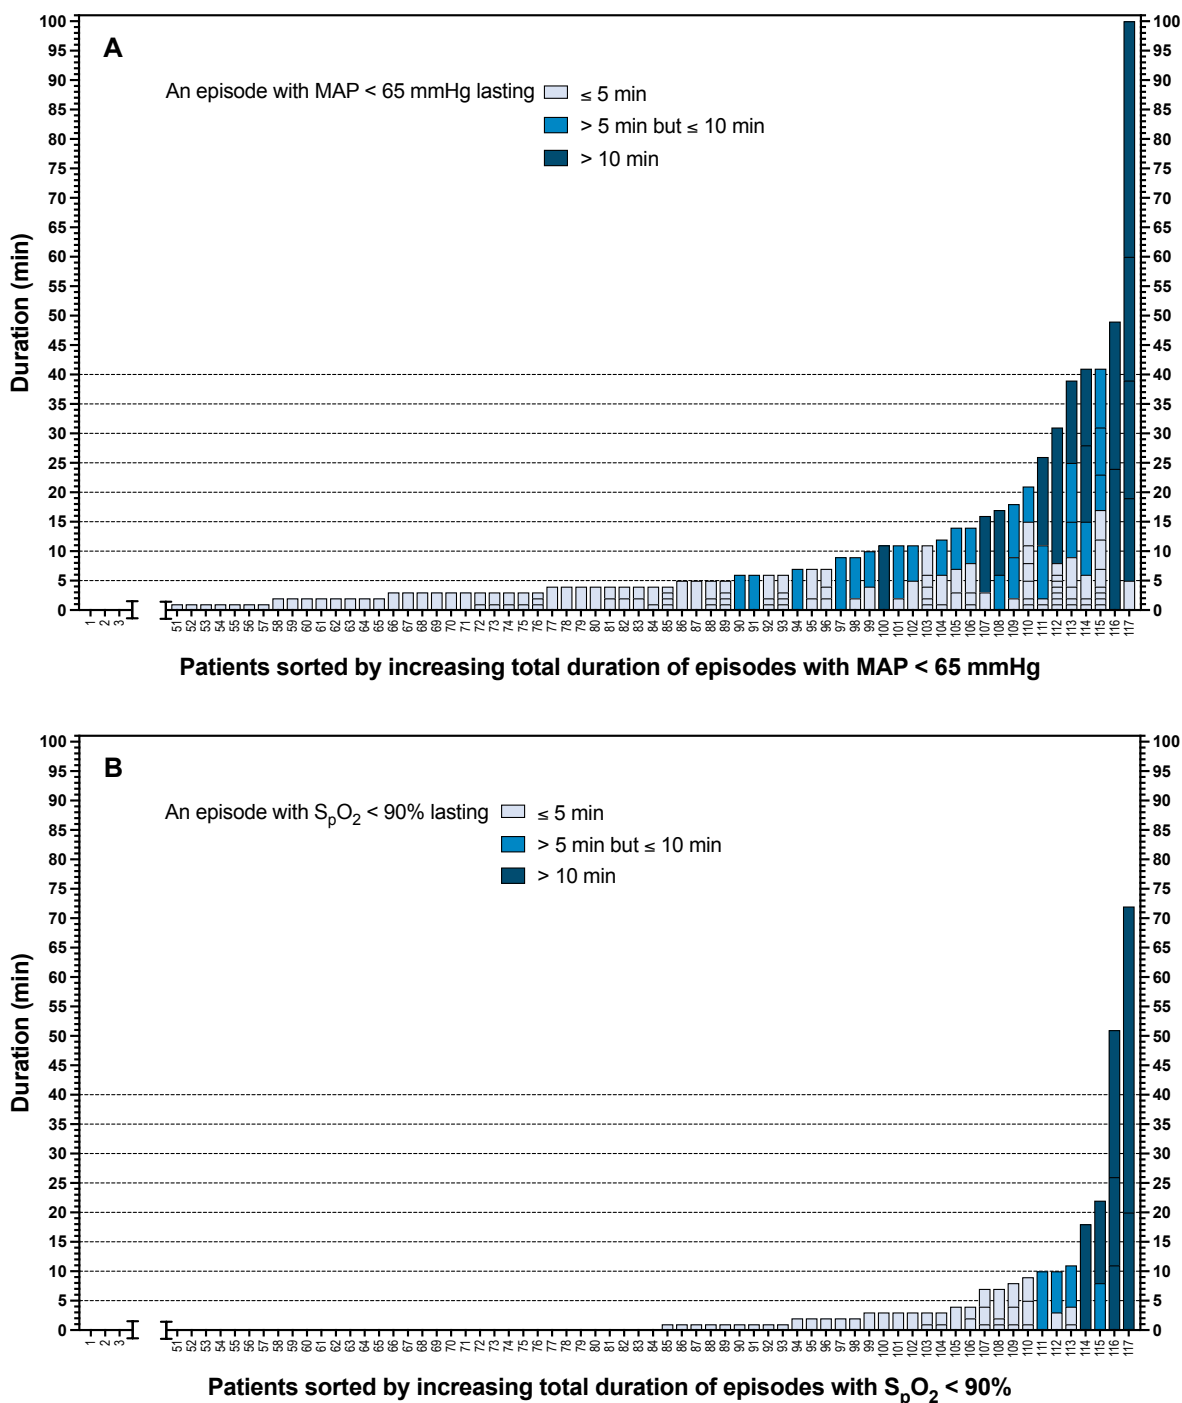

**Fig. S2 Stacked bar charts showing the individual episodes with MAP < 65 mmHg (a) or with  $S_pO_2 < 90\%$  (b) for each of the 117 patients.** The gap in the x-axis saves space. The discrete episodes with MAP < 65 mmHg (ranging from 1 to 40 min) or  $S_pO_2 < 90\%$  (ranging from 1 to 52 min) are grouped by patient. Patient numbers in (a) do not correspond with those in (b) as a result of sorting the patients according to the total duration of MAP < 65 mmHg or  $S_pO_2 < 90\%$ . Fifty patients (43%) had no episode with MAP < 65 mmHg, and 84 patients (72%) had no episode where  $S_pO_2 < 90\%$ . At least one episode lasting > 5 min with MAP < 65 mmHg or  $S_pO_2 < 90\%$  occurred in 20% or 6%, respectively, of the patients. For episodes lasting > 10 min these percentages were 8% or 3.4%, respectively

**Table S4. Minor adverse events that occurred between patient handover at the referring ICU and patient handover at the receiving ICU**

| Type of adverse event                                                                   | Period  | Case #           | n (%) <sup>a</sup> |
|-----------------------------------------------------------------------------------------|---------|------------------|--------------------|
| <b>Equipment related events</b>                                                         |         |                  |                    |
| Black out of Hamilton ventilator display                                                | Tref    | 72               | 1                  |
| Battery failure Hamilton ventilator shortly before landing                              | Tair    | 3 <sup>b</sup>   | 1                  |
| Battery failure Braun syringe driver block shortly before landing                       | Tair    | 3 <sup>b</sup>   | 1                  |
| <b>Subtotal</b>                                                                         |         |                  | <b>3 (2.6)</b>     |
| <b>Medical adverse events</b>                                                           |         |                  |                    |
| Disconnection of pump delivering propofol resulted in blood pressure increase           | Tref    | 80               | 1                  |
| Difficulty to ventilate the patient resulting in increased end-expired pCO <sub>2</sub> | Tair    | 124              | 1                  |
| Disconnection of orotracheal tube during disembarkation                                 | Tground | 18               | 1                  |
| Disconnection of orotracheal tube during transport towards ICU                          | Tground | 126 <sup>c</sup> | 2                  |
| <b>Subtotal</b>                                                                         |         |                  | <b>5 (4.3)</b>     |
| <b>Human factor related events</b>                                                      |         |                  |                    |
| Unfamiliarity with Hamilton ventilator                                                  | Tair    | 39               | 1                  |
| Damage syringe driver after drop                                                        | Tground | 126 <sup>c</sup> | 1                  |
| <b>Subtotal</b>                                                                         |         |                  | <b>2 (1.7)</b>     |
| <b>Grand total</b>                                                                      |         |                  | <b>10 (8.5)</b>    |

<sup>a</sup> Percentage of 117 missions

<sup>b</sup> Two incidents were noted in case #3

<sup>c</sup> Three events were noted in case #126
